# Supplementary material
Source: PubMed Central journal article supplement (PMC5013822)
Supplement: supp_kfv213_toxsci-15-0382-File011.pdf [file supp_kfv213_toxsci-15-0382-File011.pdf]

## Mouse Primer sequences were as follows:

| Gene Name      | Primer Sequence                                                     |
|----------------|---------------------------------------------------------------------|
| <b>β-Actin</b> | FW 5'CTATCGGCAATGAGCGGTTCC3'<br>RV 5'GCACTGTGTTGGCATAGAGGTC3'       |
| <b>α-SMA</b>   | FW 5'AGCCAGTCGCCATCAGGAAC3'<br>RV 5'GGGAGCATCATCACCAGCAAAG3'        |
| <b>IL-10</b>   | FW 5'AAGGCAGTGGAGCAGGTGAAG3'<br>RV 5'CACGTAGGCTTCTATGCAGTTGATG3'    |
| <b>TNF-α</b>   | FW 5'CCACCACGCTCTTCTGTCTACTG3'<br>RV 5'GGGCTACGGGCTTGTCACTC3'       |
| <b>TGF-β</b>   | FW 5'TAGCAACAATTCCTGGCGTTACC3'<br>RV 5'CCTGTATTCCGTCTCCTTGGTTC3'    |
| <b>TIMP-1</b>  | FW 5'CTGGTTCCTGGCATAATCTGAG3'<br>RV 5'GATCTGATCTGTCCACAAGCAATG3'    |
| <b>MMP-2</b>   | FW 5'ACCAAGAATTCCGACTATCCAATG3'<br>RV 5'GTACCAGTGTGAGTATCAGCATCAG3' |
| <b>COL1A1</b>  | FW 5' GCAACAGTCGCTTCACCTACA3'<br>RV 5' CAATGTCCAAGGGAGCCACAT3'      |
| <b>MMP-13</b>  | FW 5' GGTCCCAAACGAACTTAACTTACA3'<br>RV 5' CCTTGAACGTCATCAGGAAGC3'   |
| <b>MMP-10</b>  | FW5' CCTGTGTTGTCTGTCTCTCCAAGA3'<br>RV 5' CGTGCTGACTGAATCAAAGGAC3'   |
| <b>TGFBR3</b>  | FW 5' AAGAAGCGGGCTTTGGAC3'<br>RV 5' CGCACACAGCAGTTCTCC3'            |
| <b>OPN</b>     | FW 5' GATGATGATGACGATGGAGACC3'<br>RV 5' CGACTGTAGGGACGATTGGAG3'     |

## Human Primer sequences were as follows:

| Gene Name                       | Primer Sequence                                                   |
|---------------------------------|-------------------------------------------------------------------|
| <b><math>\beta</math>-Actin</b> | FW 5' GGCTCCGGCATGTGCAAG3'<br>RV 5' CCTCGGTCAGCAGCACGG3'          |
| <b><math>\alpha</math>-SMA</b>  | FW 5' CCGACCGAATGCAGAAGGA3'<br>RV 5' ACAGAGTATTTGCGCTCCGAA3'      |
| <b>SURVIVIN</b>                 | FW 5' AGAACTGGCCCTTCTTGGAGG3'<br>RV 5' CTTTTTATGTTCTCTATGGGGTC3'  |
| <b>TIMP-1</b>                   | FW 5' AGACCTACACTGTTGGCTG3'<br>RV 5' GACTGGAAGCCCTTTTCAGAG3'      |
| <b>COL1A1</b>                   | FW 5' CAGGTCTCGGTCATGGTACCT3'<br>RV 5' GTCGAGGGCCAAGACGAA3'       |
| <b>MMP-13</b>                   | FW 5' TCCCAGGAATTGGTGATAAAGTAGA3'<br>RV 5' CTGGCATGACGCGAACAATA3' |
| <b>TGFBR3</b>                   | FW 5' CTGTGCGTGAGTGGCTGTTG3'<br>RV 5' GTGCTGTGGGTTGTGTCTGC3'      |
