# Supplementary material
Source: PubMed Central journal article supplement (PMC5013822)
Supplement: supp_kfv213_toxsci-15-0382-File012.pdf [file supp_kfv213_toxsci-15-0382-File012.pdf]

|                                             | <b>Oil</b>       | <b>CCL<sub>4</sub></b> | <b>CCL<sub>4</sub>+CDDO-EA</b> | <b>P value</b> |
|---------------------------------------------|------------------|------------------------|--------------------------------|----------------|
| <b>BUN (mg/dL)</b>                          | <b>18±2.1</b>    | <b>14.8±2.5</b>        | <b>16.4±2.78</b>               | <b>0.2</b>     |
| <b>Albumin (g/dL)</b>                       | <b>2.84±0.54</b> | <b>2.4±0.32</b>        | <b>2.12±0.33</b>               | <b>0.32</b>    |
| <b>Aspartate Aminotransferase (U/L)</b>     | <b>34±8.9</b>    | <b>72±9.5</b>          | <b>70±4.4</b>                  | <b>0.084</b>   |
| <b>Alanine aminotransferasae (U/L)</b>      | <b>42.4± 8</b>   | <b>73.8±10.1</b>       | <b>76.2±9.3</b>                | <b>0.094</b>   |
| <b>Alkaline phosphatase (U/L)</b>           | <b>10±0.1</b>    | <b>57±2.5</b>          | <b>54.6±8.8</b>                | <b>0.112</b>   |
| <b>Creatinine (mg/dL)</b>                   | <b>0.0725</b>    | <b>0.088</b>           | <b>0.084</b>                   | <b>0.5</b>     |
| <b>Total protein (g/dL)</b>                 | <b>4.4±0.13</b>  | <b>4.54±0.23</b>       | <b>4.24±0.53</b>               | <b>0.9</b>     |
| <b>Gamma-glutamyl transpeptidase (IU/L)</b> | <b>5.4±0.2</b>   | <b>6.4±0.21</b>        | <b>6.8±0.11</b>                | <b>0.834</b>   |

**Supplemental Table 2**
