# Supplementary material
Source: PubMed Central journal article supplement (PMC5013822)

# Experimental Design

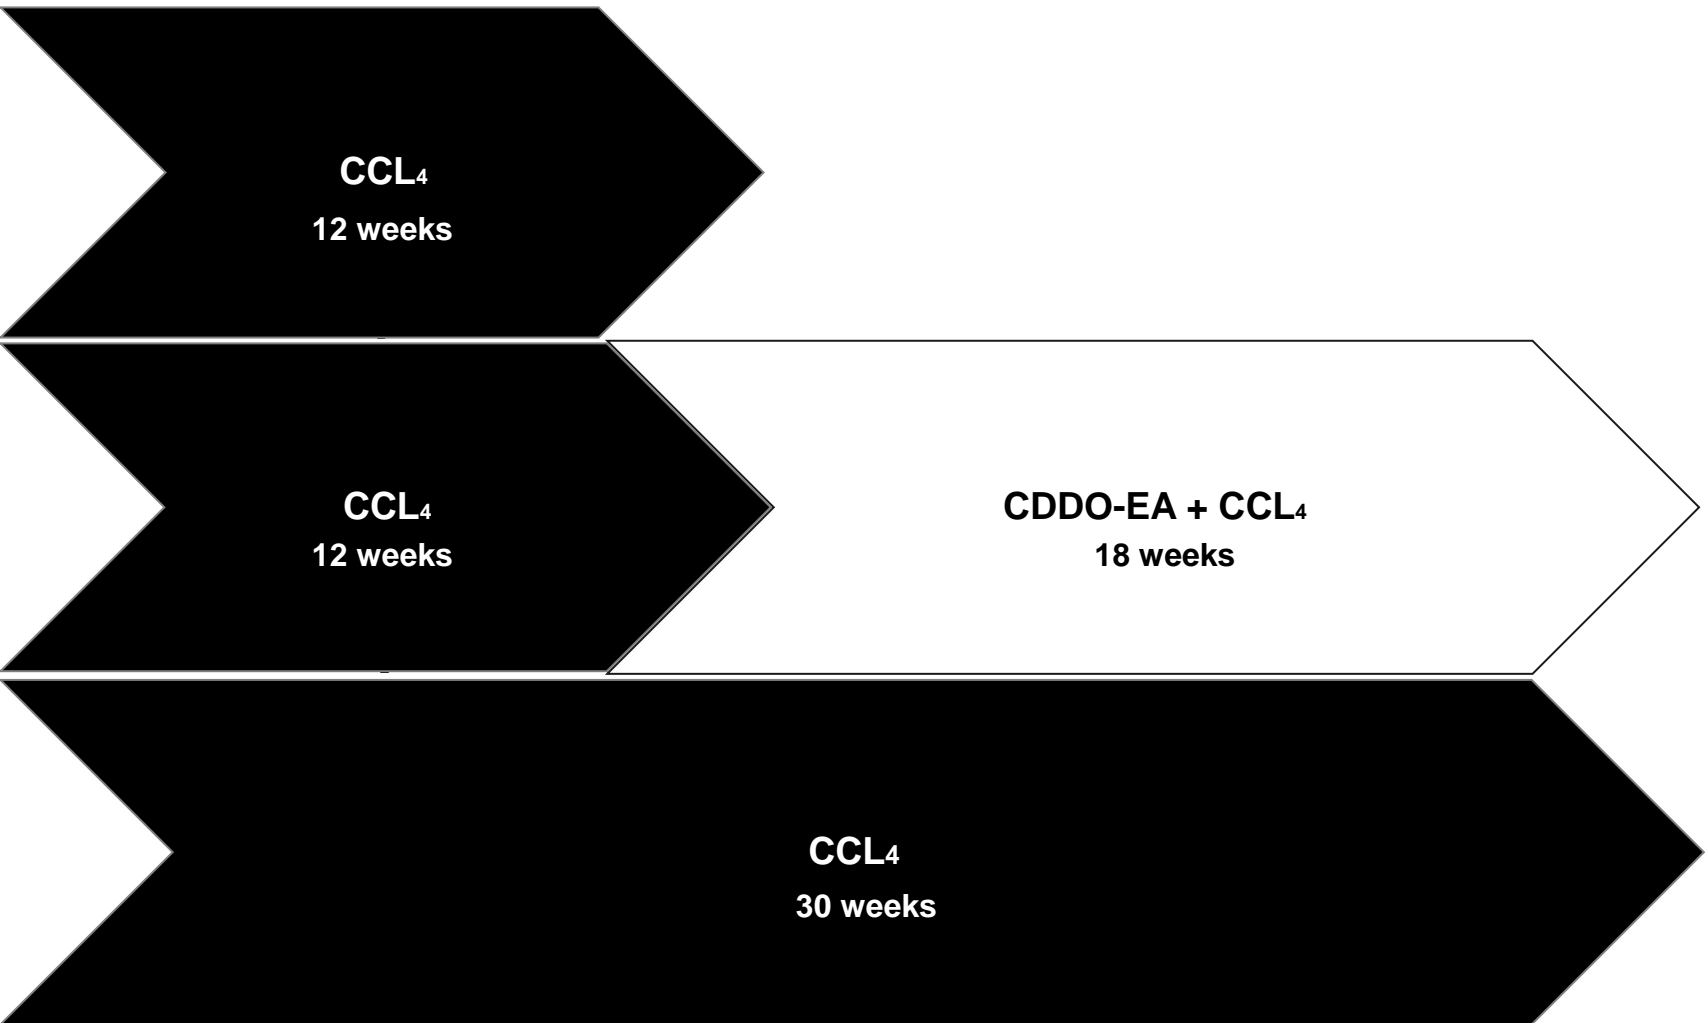

Supplement: supp_kfv213_toxsci-15-0382-File008.pdf [file supp_kfv213_toxsci-15-0382-File008.pdf]

## CYP 2E1 mRNA

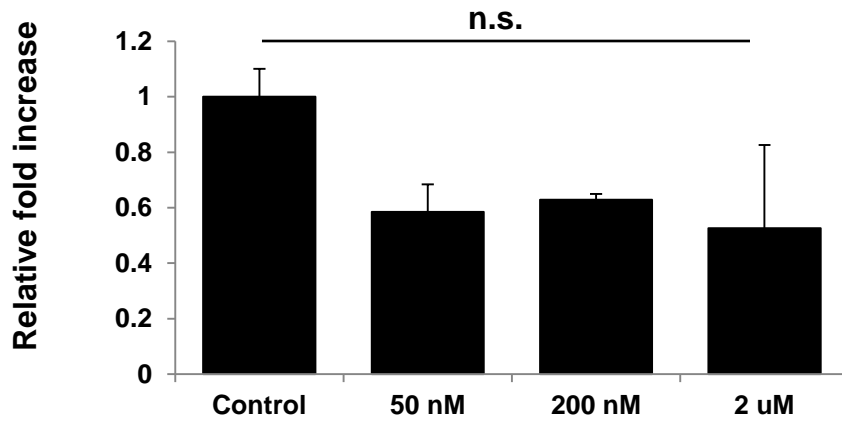

## CYP2E1 protein densitometry

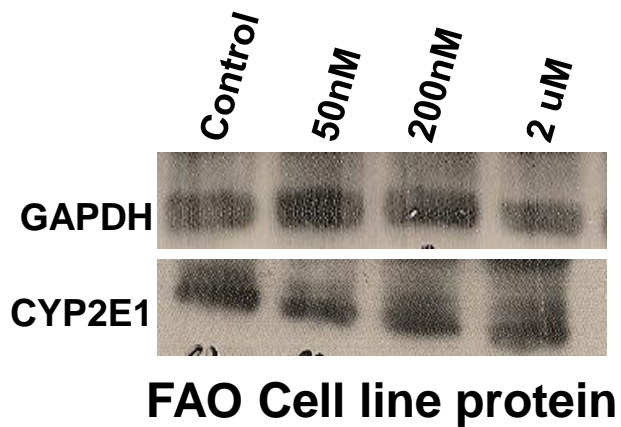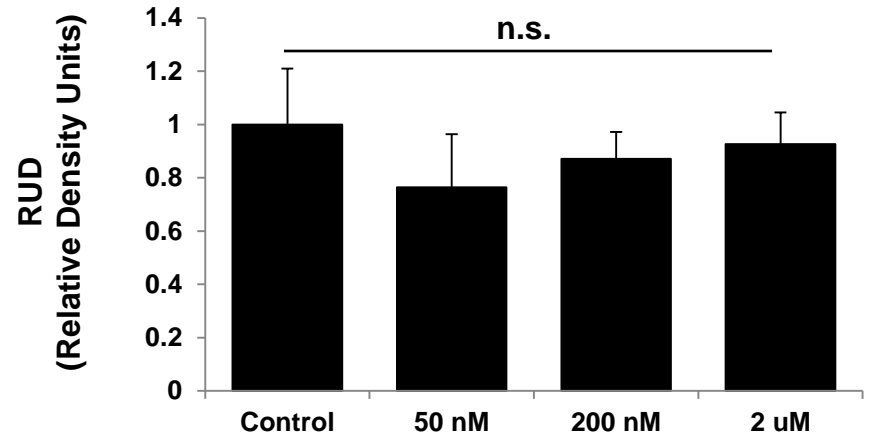

Supplement: supp_kfv213_toxsci-15-0382-File009.pdf [file supp_kfv213_toxsci-15-0382-File009.pdf]

# Regulation of Fibrosis (Human Hepatic Stellate Cells)

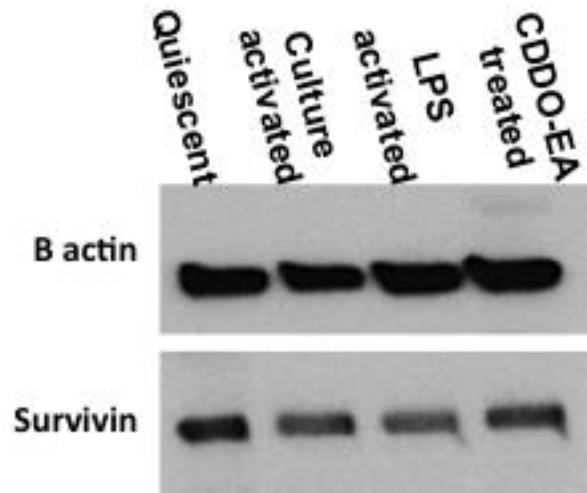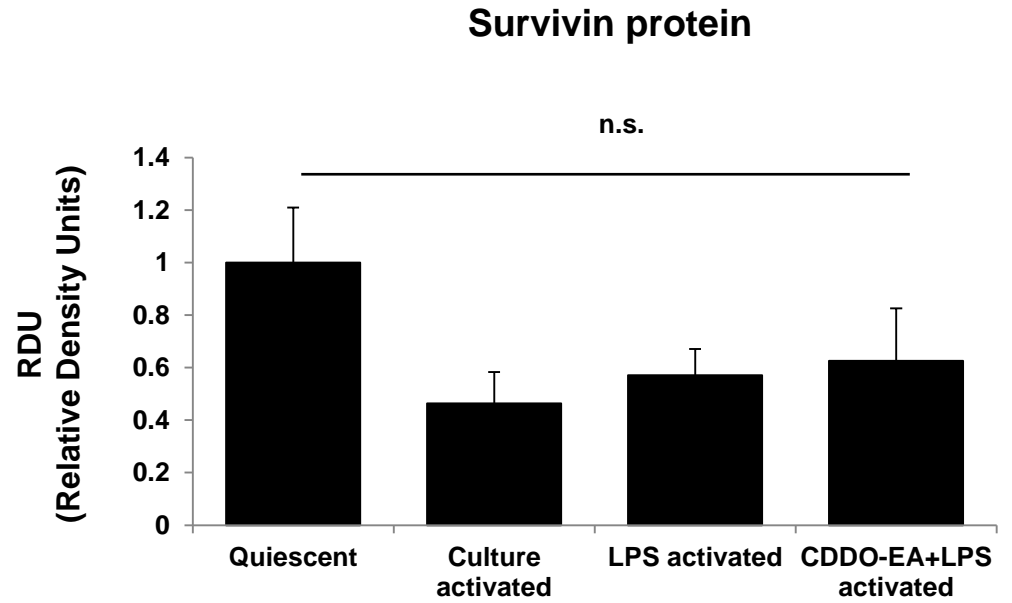

Supplement: supp_kfv213_toxsci-15-0382-File010.pdf [file supp_kfv213_toxsci-15-0382-File010.pdf]
